# Supplementary material for: Alcohol Induces More Severe Fatty Liver Disease by Influencing Cholesterol Metabolism
Source: Hindawi journal article supplement (doi:10.1155/2019/7095684), 2019-02-12
Supplement: f1 [file 7095684.f1.pdf]

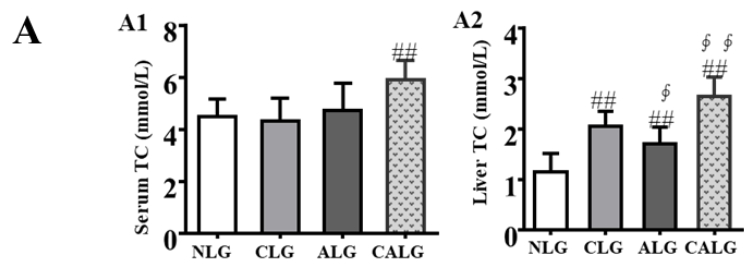

**Fig.S1.** Mice fed with 4% alcohol & 0.5% cholesterol LD increased serum TC after feeding 3 weeks (**A1**) and liver levels of TC (**A2**) after feeding 5 weeks. Values were expressed as the mean  $\pm$  SD (n=6). # p<0.05, ## p<0.01 vs NLG; \$ p<0.05, \$\$ p<0.01 vs CLG.
